# Supplementary material
Source: HighWire-hosted journal article supplement (http://jpet.aspetjournals.org/highwire/filestream/135693/field_highwire_adjunct_files/0/Figure_1.pdf)

**A**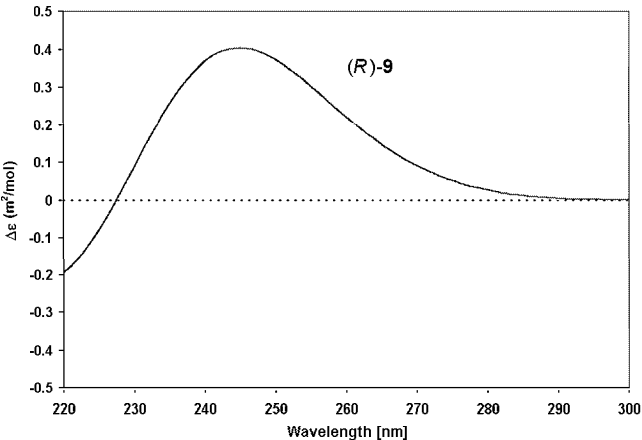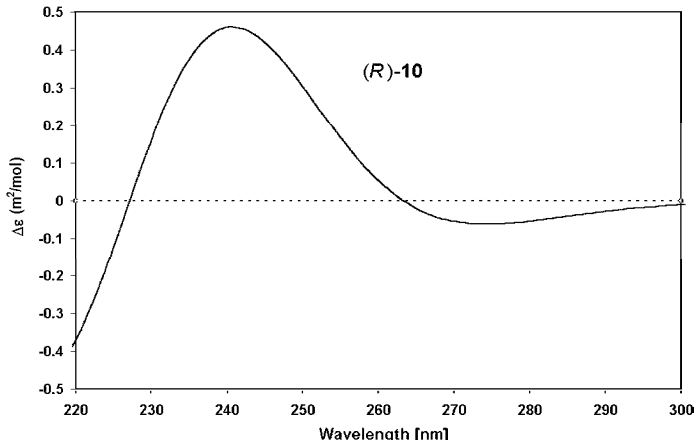**B**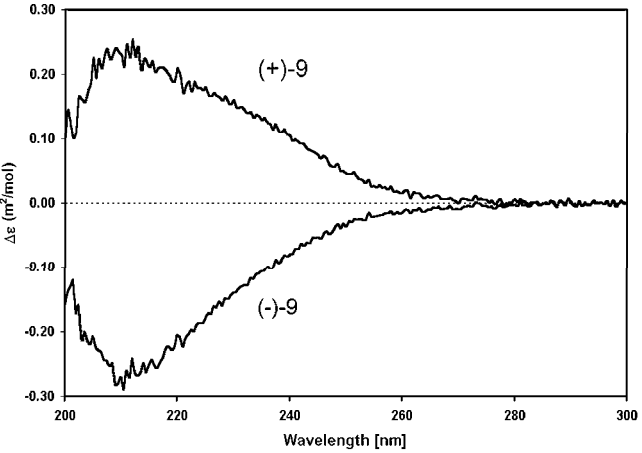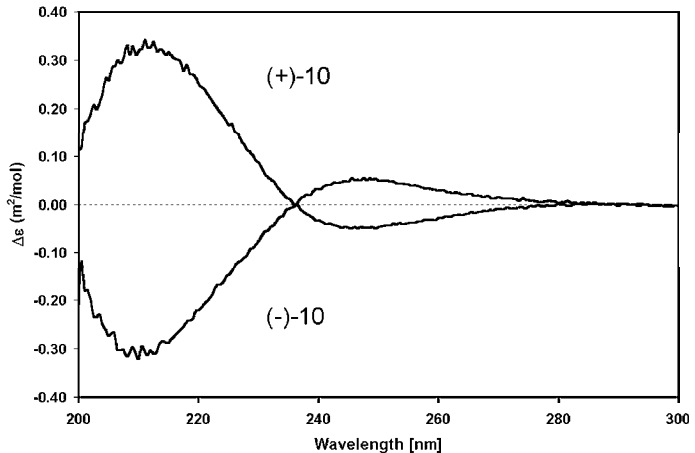**Figure1\_supp\_data**

Supplement: Figure_1.pdf [file Figure_1.pdf]
